# Supplementary material for: Global Identification of White Lupin lncRNAs Reveals Their Role in Cluster Roots under Phosphorus Deficiency
Source: MDPI journal article supplement (doi:10.3390/ijms23169012), 2022-08-12
Supplement: s1 [file s1]

**Table S1.** A list of primers used to perform qRT-PCR analysis.

| Gene ID     | Forward Primer               | Reverse Primer              |
|-------------|------------------------------|-----------------------------|
| XLOC_032277 | GTATGTCGGATAAGGATGTGATG      | CCCAACAGTCCATCATTTTTAGC     |
| XLOC_036022 | CATGTCAGCGAACCTTCGC          | CACGAACTCATGTTGAAGTGAG      |
| XLOC_037391 | TGGGCGGGATTCTTCGC            | CCGCCTCCAACCTTACGATCTC      |
| XLOC_001537 | TTGTGAGCAGAATTGGAGTT         | CCGTGGAGTTGAGTTGTG          |
| XLOC_021566 | GCATTGAGAGGCTACCACTATGT      | CTTGACTTGAGCTGATGTAAAGGAG   |
| XLOC_032117 | GTTTTGGAATTAGTGGTCTCGTTT     | GAAGTTAGGATGGCTGGTTCA       |
| XLOC_033129 | ACCAACTATACTAAGTATTCCTTTAGCC | ACTGAAGTCTATAGCTCAATCACACAC |
| XLOC_017555 | ATAAGATTGCTCATGCCGTGG        | CTTTTCTACAATGACCACCCAAC     |
| XLOC_016614 | ATCGAATTAAGCCATCAGCTCAGA     | CTTGAGATGGTAGGAAAAGGTTTTGG  |
| XLOC_034293 | TCGTTGGCACTGTGAGTGAG         | GATTGAGGATCAAAGGAACAGGGC    |
| XLOC_000074 | CTTCTGGTTTTCTTGCTTGGATG      | GGCCAAAATTCAAGCCATGTA       |
| XLOC_024551 | ATTTTCTGCCGTCTCTAGCCC        | GTAGCGGAGTTACTGGAATGGG      |
| XLOC_004416 | GGAAGAAGAGTTGATCAAAGAAGAGG   | GGATCTGATGCACTCAGCTAAC      |
| Ubiquitin   | GTCCACACTCCACCTTGTGC         | GAGGAATGCCCTCCTTGTCTCT      |

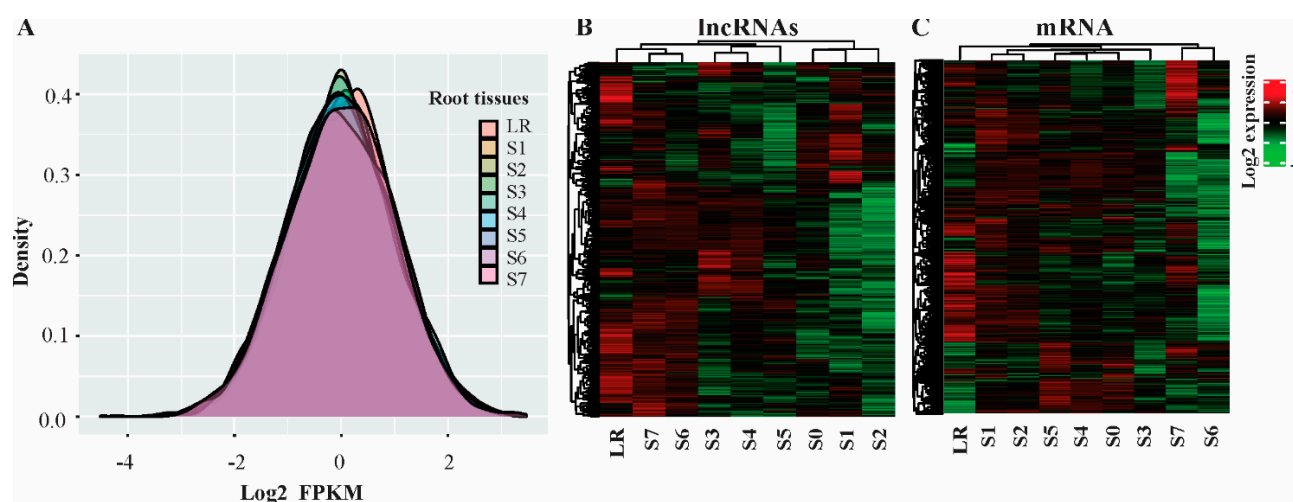

**Figure S1.** Expression of white lupin lncRNAs and mRNA in different developmental stages of roots (S0-S7 and LR) under P deficiency. **A)** Density plot of average expression of lncRNAs, **B)** Expression of lncRNAs, **C)** Expression of mRNA. S0-S7 indicates different developmental stages of cluster root and LR indicates lateral root which is used as control.
